# Supplementary material for: A protocol for a Canadian prospective observational study of decision-making on active surveillance or surgery for low-risk papillary thyroid cancer
Source: PubMed Central journal article supplement — BMJ Open. 2018 Apr 12;8(4):e020298. doi: 10.1136/bmjopen-2017-020298 (PMC5898309; doi:10.1136/bmjopen-2017-020298), 2018-04-12
Supplement: bmjopen-2017-020298.draft_revisions.pdf [file bmjopen-2017-020298.draft_revisions.pdf]

# BMJ Open

BMJ Open is committed to open peer review. As part of this commitment we make the peer review history of every article we publish publicly available.

When an article is published we post the peer reviewers' comments and the authors' responses online. We also post the versions of the paper that were used during peer review. These are the versions that the peer review comments apply to.

The versions of the paper that follow are the versions that were submitted during the peer review process. They are not the versions of record or the final published versions. They should not be cited or distributed as the published version of this manuscript.

BMJ Open is an open access journal and the full, final, typeset and author-corrected version of record of the manuscript is available on our site with no access controls, subscription charges or pay-per-view fees (<http://bmjopen.bmj.com>).

If you have any questions on BMJ Open's open peer review process please email [info.bmjopen@bmj.com](mailto:info.bmjopen@bmj.com)

# BMJ Open

## Deciding on Active Surveillance or Surgery for Primary Management of Low Risk Papillary Thyroid Cancer: Study Protocol for a Prospective Observational Study

|                                 |                                                                                                                                                                                                                                                                                                                                                                                                                                                                                                                                                                                                                                                                                                                                                                                                                                                                                                                                                                                                                                                                                                          |
|---------------------------------|----------------------------------------------------------------------------------------------------------------------------------------------------------------------------------------------------------------------------------------------------------------------------------------------------------------------------------------------------------------------------------------------------------------------------------------------------------------------------------------------------------------------------------------------------------------------------------------------------------------------------------------------------------------------------------------------------------------------------------------------------------------------------------------------------------------------------------------------------------------------------------------------------------------------------------------------------------------------------------------------------------------------------------------------------------------------------------------------------------|
| Journal:                        | <i>BMJ Open</i>                                                                                                                                                                                                                                                                                                                                                                                                                                                                                                                                                                                                                                                                                                                                                                                                                                                                                                                                                                                                                                                                                          |
| Manuscript ID                   | bmjopen-2017-020298                                                                                                                                                                                                                                                                                                                                                                                                                                                                                                                                                                                                                                                                                                                                                                                                                                                                                                                                                                                                                                                                                      |
| Article Type:                   | Protocol                                                                                                                                                                                                                                                                                                                                                                                                                                                                                                                                                                                                                                                                                                                                                                                                                                                                                                                                                                                                                                                                                                 |
| Date Submitted by the Author:   | 25-Oct-2017                                                                                                                                                                                                                                                                                                                                                                                                                                                                                                                                                                                                                                                                                                                                                                                                                                                                                                                                                                                                                                                                                              |
| Complete List of Authors:       | Sawka, Anna; Endocrinology<br>Ghai, Sangeet; University Health Network, Radiology<br>Tomlinson, George; University of Toronto, Epidemiology and Biostatistics<br>Rotstein, Lorne; University Health Network, Surgery<br>Gilbert, Ralph; University Health Network, Head and Neck Surgery<br>Gullane, Patrick; University Health Network, Head and Neck Surgery<br>Pasternak, Jesse; University Health Network, Surgery<br>Brown, Dale; University Health Network, Head and Neck Surgery<br>de Almeida, John; University of Toronto, Wharton Head and Neck Centre<br>Irish, Jonathan; University Health Network, Head and Neck Surgery<br>Chepeha, Douglas; University Health Network, Head and Neck Surgery<br>Higgins, Kevin; Sunnybrook Health Sciences Centre, Head and Neck Surgery<br>Monteiro, Eric; Mount Sinai Hospital, Head and Neck Surgery<br>Jones, J; Princess Margaret Cancer Centre, Psychosocial Oncology<br>GAFNI, Amiram; McMaster University (HSC-3H29), Department of Clinical Epidemiology and Biostatistics<br>Goldstein, David; University Health Network, Head and Neck Surgery |
| <b>Primary Subject Heading</b>: | Oncology                                                                                                                                                                                                                                                                                                                                                                                                                                                                                                                                                                                                                                                                                                                                                                                                                                                                                                                                                                                                                                                                                                 |
| Secondary Subject Heading:      | Medical management, Patient-centred medicine, Radiology and imaging, Surgery                                                                                                                                                                                                                                                                                                                                                                                                                                                                                                                                                                                                                                                                                                                                                                                                                                                                                                                                                                                                                             |
| Keywords:                       | Endocrine tumours < DIABETES & ENDOCRINOLOGY, Head & neck tumours < ONCOLOGY, Head & neck imaging < RADIOLOGY & IMAGING, Head & neck surgery < SURGERY                                                                                                                                                                                                                                                                                                                                                                                                                                                                                                                                                                                                                                                                                                                                                                                                                                                                                                                                                   |
|                                 |                                                                                                                                                                                                                                                                                                                                                                                                                                                                                                                                                                                                                                                                                                                                                                                                                                                                                                                                                                                                                                                                                                          |

SCHOLARONE™  
Manuscripts

1  
2  
3 **Deciding on Active Surveillance or Surgery for**  
4  
5  
6 **Primary Management of Low Risk Papillary Thyroid Cancer:**  
7  
8  
9 **Study Protocol for a Prospective Observational Study**  
10  
11  
12  
13  
14  
15

16 Anna M. Sawka<sup>1</sup>, Sangeet Ghai<sup>2</sup>, George Tomlinson<sup>3</sup>, Lorne Rotstein<sup>4</sup>, Ralph Gilbert<sup>5</sup>,  
17 Patrick Gullane<sup>5</sup>, Jesse Pasternak<sup>4</sup>, Dale Brown<sup>5</sup>, John de Almeida<sup>5</sup>, Jonathan Irish<sup>5</sup>,  
18 Douglas Chepeha<sup>5</sup>, Kevin Higgins<sup>6</sup>, Eric Monteiro<sup>7</sup>, Jennifer Jones<sup>8</sup>, Amiram Gafni<sup>9</sup>,  
19 David P. Goldstein<sup>5</sup>  
20  
21  
22  
23  
24  
25  
26  
27  
28

29 <sup>1</sup>Department of Endocrinology, University Health Network and University of Toronto,  
30 Toronto, Canada  
31  
32  
33

34 <sup>2</sup>Department of Radiology, University Health Network and University of Toronto,  
35 Toronto, Canada  
36  
37  
38

39 <sup>3</sup>Department of Epidemiology and Biostatistics, University Health Network and  
40 University of Toronto, Toronto, Canada  
41  
42  
43  
44

45 <sup>4</sup>Department of Surgery, University Health Network and University of Toronto, Toronto,  
46 Canada  
47  
48  
49

50 <sup>5</sup>Department of Otolaryngology and Head and Neck Surgery, University Health Network  
51 and University of Toronto, Toronto, Canada  
52  
53  
54  
55  
56  
57  
58  
59  
60

1  
2  
3 <sup>6</sup>Department of Otolaryngology and Head and Neck Surgery, Sunnybrook Health  
4  
5 Sciences Centre and University of Toronto, Toronto, Canada  
6  
7

8  
9 <sup>7</sup>Department of Otolaryngology and Head and Neck Surgery, Sunnybrook Health  
10  
11 Sciences Centre and University of Toronto, Toronto, Canada  
12  
13

14 <sup>8</sup>Department of Psychosocial Oncology, University Health Network and University of  
15  
16 Toronto, Toronto, Canada  
17  
18

19  
20 <sup>9</sup>Centre for Health Economics and Policy Analysis, McMaster University, Hamilton,  
21  
22 Canada  
23  
24  
25  
26  
27  
28

29 **Correspondence to:** Anna M. Sawka; sawkaam@yahoo.com  
30  
31  
32  
33  
34  
35  
36  
37  
38  
39  
40  
41  
42  
43  
44  
45  
46  
47  
48  
49  
50  
51  
52  
53  
54  
55  
56  
57  
58  
59  
60

## ABSTRACT

**Introduction** Low risk papillary thyroid cancer (PTC) is increasingly being diagnosed throughout the world; yet the mortality risk is low compared to other malignancies.

Traditional management includes thyroid surgery, sometimes followed by radioactive iodine and thyroid hormone treatment. Active surveillance (AS) has been proposed as a means to reduce over treatment of PTC. AS involves close disease follow-up, with the intention to intervene if the disease progresses, or upon patient request.

**Methods and analysis** This is a multi-phase prospective observational study. In the first phase of this study, consenting eligible adults with low risk PTC that is < 2cm in maximal diameter, confined to the thyroid, and not immediately adjacent to critical structures in the neck, are provided verbal and written information about PTC disease prognosis following surgery or AS. Questionnaires are administered at baseline and after the disease management decision on AS or surgery is finalized. Patients may choose either option (surgery or AS), and the primary outcome is the frequency with which either disease management option is chosen. Secondary outcomes include: rationale for the decision, role of the patient in decision-making, and decision satisfaction.

In the second phase of the study, consenting eligible adult patients who completed the first study phase may enroll in respective AS or surgery group follow-up studies. The following outcomes are examined 1 year after enrollment in the follow-up phase: decision regret about disease management choice (primary outcome), psychological distress, disease-specific quality of life, fear of disease progression, body image

1  
2  
3 satisfaction, disease progression, cross-over to surgery in the AS group, new chronic  
4  
5 thyroid hormone use, and healthcare resource utilization.  
6  
7

8  
9 **Ethics and dissemination** The University Health Network Research Ethics Board  
10  
11 approved this study (ID 15-8942). The results will be published in an open access  
12  
13 journal.  
14

15  
16  
17 **Registration details** Clinicaltrials.gov: NCT03271892

18  
19 (<https://clinicaltrials.gov/ct2/show/NCT03271892?term=NCT03271892&cond=Thyroid+Cancer%2C+Papillary&cntry1=NA%3ACA&rank=1>)  
20  
21  
22  
23  
24  
25  
26  
27

### 28 **Strengths and limitations of this study**

#### 29 **Strengths**

- 30  
31  
32  
33  
34  
35  
36  
37  
38  
39  
40  
41  
42
- This is the first study to conduct a detailed prospective evaluation of decision-making related to the choice of active surveillance (AS) or immediate thyroid surgery, for management of low risk papillary thyroid cancer (PTC).
  - All patients being considered for enrollment must have cytopathological confirmation of the diagnosis of PTC or “suspicious for PTC” with review or relevant neck imaging by an experienced study radiologist +/- experienced thyroid surgeon.
  - This is a prospective study.
  - This study is not funded by industry.

#### 43 **Limitations**

- 44  
45  
46  
47  
48  
49  
50  
51  
52  
53  
54
- This study is not randomized. However, by enabling patients to choose their disease management strategy, our study will inform the understanding of decision-making process of patients with low risk PTC considering the choice of AS or surgery.
  - For patients who undergo thyroid cancer surgery, the surgical procedure and associated follow-up procedures will be at the discretion of the treating physician and patient; surgery is not restricted to be performed in the study centre. The surgical group is intended to reflect usual care and medical records of thyroid cancer-related care will be reviewed.

1  
2  
3 Increased utilization of diagnostic imaging has resulted in increased diagnosis of  
4  
5 incidental malignancies that have a low risk of progression or death.<sup>1</sup> Some recent  
6  
7 annual estimates on the number of individuals newly diagnosed with thyroid cancer  
8  
9 include: 298,000 world-wide<sup>2</sup>, 7,100 in Canada<sup>3</sup>, 56,870 in the United States<sup>4</sup>, 53,000 in  
10  
11 Europe<sup>5</sup>, and 3,400 in the United Kingdom<sup>2</sup>. In Canada, TC incidence is rising faster  
12  
13 than any other malignancy<sup>3</sup>, with an increase of 156% from 1991 to 2006<sup>6</sup>. The survival  
14  
15 rate of thyroid cancer is among the highest of all malignancies<sup>3,4</sup> and the 5-year survival  
16  
17 rate for early stage (local) thyroid cancer is reported to be >99%<sup>4</sup>. Most of the increase  
18  
19 in thyroid cancer incidence is attributed to detection of papillary thyroid cancer (PTC) ≤  
20  
21 2cm in diameter<sup>7-11</sup>, especially, localized disease without metastases (i.e. no spread of  
22  
23 disease beyond the thyroid)<sup>8,11,12</sup>. PTCs ≤2 cm in diameter are estimated to account for  
24  
25 60-68% of new cases<sup>7,9</sup>. Thyroid cancer treatment traditionally involves thyroid surgery,  
26  
27 which may be followed by thyroid hormone replacement (lifelong) and radioactive iodine  
28  
29 treatment<sup>13-15</sup>. However, treatment-related morbidity in individuals at low risk of dying  
30  
31 from their disease is a relevant concern; thus the consideration of an option for a  
32  
33 conservative, non-operative management approach for select to low risk PTC cases,  
34  
35 has been proposed by some experts<sup>16-18</sup>.

36  
37 Active surveillance (AS) of a malignancy consists of close clinical/diagnostic test follow-  
38  
39 up (in lieu of immediate surgery), with the intention of treatment with curative intent if the  
40  
41 disease progresses or the patient requests it. In two recent prospective observational  
42  
43 studies from Japan, patients with PTC ≤1cm in diameter underwent AS and there were  
44  
45 no TC-related deaths, no distant metastatic recurrences, and the rate of cervical lymph  
46  
47 node recurrence was approximately 1 to 2% (followed on average for 5-6 years)<sup>19,20</sup>.

1  
2  
3 Furthermore, primary tumors under AS did not significantly grow (i.e.  $\geq 3$  mm diameter  
4 increase) in 93% to 95% of individuals over this time period<sup>19,20</sup>. Moreover, all cases of  
5 disease progression under AS were successfully cured with surgery<sup>19,20</sup> and the  
6 majority of patients who initially accepted AS, avoided thyroid surgery (84-94% over  
7 about 5-6 years)<sup>19,20</sup>. Furthermore, in a recently published report from an ongoing  
8 American AS study, Tuttle et al. reported low rates of tumor growth (3.8% of cases) and  
9 no evidence of incident metastatic disease, in a cohort of 291 PTC patients whose  
10 primary tumor was  $\leq 1.5$  cm in maximal diameter (median 25 month follow-up period)<sup>21</sup>.  
11 A highly important consideration is the extent to which AS may be considered as an  
12 acceptable disease management by patients diagnosed with low risk PTC. In the largest  
13 study of AS in Japan, 55% of individuals with papillary microcarcinoma chose to  
14 undergo AS, when offered this option or surgery.<sup>22</sup> Similar data are not yet available  
15 from other parts of the world. However, the recent report of 291 patients with low risk  
16 PTC have been enrolled in an AS study in the United States,<sup>21</sup> suggests that there may  
17 be interest in this option in North America. In an in-depth qualitative study from the  
18 same institution, the rationale for patient choice of surgery or AS was studied 15  
19 patients.<sup>23</sup> In this study, D'Agostino et al. reported that that patients who opted for  
20 surgery perceived a strong threat of the disease and were motivated to cure the  
21 malignancy, whereas those who chose AS perceived the disease to be relatively  
22 indolent and were motivated to avoid living without their thyroid (and possible reliance  
23 on thyroid hormone replacement)<sup>23</sup>. The frequency with which Canadian with low risk  
24 PTC would prefer AS or surgery (and the rationale for the choice), is unknown.  
25  
26 Furthermore, prospectively collected quantitative data on decision-making process and  
27  
28  
29  
30  
31  
32  
33  
34  
35  
36  
37  
38  
39  
40  
41  
42  
43  
44  
45  
46  
47  
48  
49  
50  
51  
52  
53  
54  
55  
56  
57  
58  
59  
60



1  
2  
3 relevant psychosocial/quality of life patient reported outcomes are needed for low risk  
4  
5 PTC patients offered the options of surgery or AS.  
6  
7

## 8 **DESIGN, METHODS AND ANALYSIS**

### 9 **Study design and setting**

10  
11 We are conducting a multi-phase prospective observational study of patients with low  
12  
13 risk PTC. The study is currently being conducted at the University Health Network  
14  
15 (UHN) hospitals in Toronto (including Toronto General Hospital, Princess Margaret  
16  
17 Cancer Centre, and Toronto Western Hospital), with the plan to add additional sites, if  
18  
19 feasible.  
20  
21  
22  
23

### 24 **Study aim and primary outcomes in respective study phases**

25  
26 In the first phase of this study, our aim is to prospectively examine the decision-making  
27  
28 process of patients with low risk PTC considering surgery or active surveillance and the  
29  
30 primary outcome is the frequency (percentage) of patients choosing AS or surgery,  
31  
32 respectively. In the second phase of the study, consenting patients who completed the  
33  
34 first phase of the study are followed in the respective study arms of a) active  
35  
36 surveillance, or b) surgery (according to patient choice). The primary outcome in the  
37  
38 second phase of the study is decision regret (with respect to the decision on AS or  
39  
40 surgery, to be described in respective arms).  
41  
42  
43  
44  
45

### 46 **The study population eligibility criteria and recruitment**

47  
48 In the first phase of the study, we are enrolling consenting eligible adults (age  $\geq 18$   
49  
50 years) with surgically untreated low risk PTC that is confined to the thyroid, not  
51  
52 immediately adjacent to critical structures in the neck (e.g. trachea or recurrent  
53  
54 laryngeal nerve), and measures  $< 2$ cm in maximal diameter (Table 1). The inclusion  
55  
56  
57  
58  
59  
60

1  
2  
3 criteria, relating to the primary tumor characteristics, were reviewed and approved (by  
4  
5 consensus) by all thyroid cancer surgeons in our institution. In the first study phase,  
6  
7 study participants are provided verbal and written information about thyroid cancer  
8  
9 disease prognosis and information about AS. This information is regularly updated to  
10  
11 reflect the evolving evidence on long-term outcomes with AS of low risk PTC.  
12  
13  
14 Participants are free to choose either surgery or AS for management of their thyroid  
15  
16 cancer. Eligible consenting patients who have completed the first phase of this study  
17  
18 (and rendered a disease management decision) may enroll in the second phase of the  
19  
20 study, which includes study follow-up of respective disease management arms of: a)  
21  
22 active surveillance, or b) thyroid cancer surgery. Patient recruitment is focused in  
23  
24 participating thyroid cancer surgical clinics, although eligible patients may be referred by  
25  
26 other healthcare providers or self-referred. All patients receive a formal consultation  
27  
28 from a thyroid cancer surgeon (of their choice) prior to consideration of enrollment in  
29  
30 any phase of the study. Patients who may be eligible for the study, are offered the  
31  
32 opportunity to meet with a research assistant. Screening for eligibility is performed by a  
33  
34 research assistant, under the supervision of one or more of the primary co-primary  
35  
36 investigators (DPG, AMS). Baseline neck imaging studies are reviewed by a study  
37  
38 radiologist (SG) and surgeon (DPG) to confirm eligibility.  
39  
40  
41  
42  
43  
44  
45

### 46 **Study follow-up assessments and outcomes**

47  
48  
49 In the first phase of the study (decision-making phase), a baseline medical history,  
50  
51 physical examination and laryngoscopy (if not already performed), are performed.  
52  
53  
54 Several questionnaires are administered at baseline (prior to the presentation of the  
55  
56 information about AS), as well as after the disease management decision on AS or  
57  
58  
59  
60

1  
2  
3 surgery is finalized (generally within a few months of study enrollment). Baseline  
4  
5 questionnaires include questions on demographic and medical history, coping  
6  
7 mechanisms (Brief Cope Questionnaire<sup>24</sup>), fear of disease progression (Short form of  
8  
9 the Fear of Progression Questionnaire<sup>25,26</sup>), fear of surgery (Surgical Fear  
10  
11 Questionnaire<sup>27</sup>), and decision self-efficacy (Decision Self-Efficacy Scale<sup>28</sup>). The primary  
12  
13 outcome is the frequency with which either disease management option is chosen by  
14  
15 the patient (AS or immediate surgery). Secondary outcomes include: rationale for the  
16  
17 decision, role of the patient in decision-making, and decision satisfaction<sup>29</sup>.  
18  
19

20  
21  
22 In the second phase of the study, consenting eligible adult patients who completed the  
23  
24 first study phase may enroll in a follow-up study of respective AS or surgery arms. The  
25  
26 active surveillance arm includes follow-up assessments by study investigators at least  
27  
28 every 6 months for two years, followed by yearly (if no evidence of disease  
29  
30 progression). These assessments include clinical history and examination, neck  
31  
32 ultrasound, and measurement of TSH, free thyroxine, thyroglobulin, and thyroglobulin  
33  
34 antibody. More frequent assessments or additional investigations may be arranged,  
35  
36 depending on clinical circumstances. Thyroid hormone treatment is offered as per  
37  
38 current clinical practice guidelines for chronic management of low risk PTC<sup>13</sup>, but its use  
39  
40 is not mandated for participation in the AS follow-up study. The criteria for disease  
41  
42 progression prompting a recommendation for surgery are shown in Table 2. All patients  
43  
44 under active surveillance are free to choose to have surgery at any time point, in  
45  
46 absence of disease progression. For consenting patients who choose surgery for  
47  
48 primary management of their disease, the treating surgeon and patient will decide on  
49  
50 the extent of the surgery and associated clinical follow-up. For study participants in  
51  
52  
53  
54  
55  
56  
57  
58  
59  
60

1  
2  
3 either arm that undergo thyroid cancer surgery, there are no restrictions on which  
4 surgeon or where the surgery may be performed (i.e. as per patient choice).  
5  
6  
7

8  
9 One year after enrollment in the respective AS or surgical follow-up study arms, the  
10 following study outcomes are examined: decision regret about disease management  
11 choice (primary outcome) (Decision Regret Scale<sup>30</sup>), psychological distress (depression  
12 and anxiety, measured by the Hospital Depression and Anxiety Scale<sup>31</sup>), disease-  
13 specific quality of life (measured by the thyroid cancer module of the MD Anderson  
14 Symptom Inventory<sup>32</sup>), fear of disease progression<sup>25,26</sup>, and body image satisfaction  
15 (measured by the Body Image Scale<sup>33</sup>). Furthermore, thyroid cancer-related medical  
16 records are examined in all patients to evaluate for disease progression, cross-over to  
17 surgery in the AS group, new chronic thyroid hormone use, and thyroid cancer-related  
18 healthcare resource utilization. Consent for review of medical records is requested for a  
19 minimum of 3 years, but an optional consent is requested for review of records up to 10  
20 years. However, indefinite clinical follow-up is offered for patients under AS, who do not  
21 undergo surgery.  
22  
23  
24  
25  
26  
27  
28  
29  
30  
31  
32  
33  
34  
35  
36  
37  
38

### 39 40 **Statistical considerations**

#### 41 42 **Sample size calculation**

43  
44 There is no a priori calculated sample size for the first phase of the study (on medical  
45 decision-making), as it is a descriptive study incorporating a convenience sample;  
46 however, the study will continue enrolling patients to adequately power meaningful  
47 analysis of the primary outcome in the follow-up study. As our primary analysis for the  
48 second phase of the study is a description of the level of decision regret in the  
49  
50  
51  
52  
53  
54  
55  
56  
57  
58  
59  
60

1  
2  
3  
4  
5  
6  
7  
8  
9  
10  
11  
12  
13  
14  
15  
16  
17  
18  
19  
20  
21  
22  
23  
24  
25  
26  
27  
28  
29  
30  
31  
32  
33  
34  
35  
36  
37  
38  
39  
40  
41  
42  
43  
44  
45  
46  
47  
48  
49  
50  
51  
52  
53  
54  
55  
56  
57  
58  
59  
60

respective AS and surgical arms at 1 year, a convenience sample should technically suffice. However, we are planning a secondary analysis, comparing decision regret between the AS and surgical groups, assuming sufficient sample size, so a sample size justification for that analysis is herein provided. There is no published data on what difference in level of regret is considered unimportant, so we chose our non-inferiority boundary based on the following considerations. Pilot decision regret data collected on a low risk PTC sample of 74 patients in a treatment decision making showed a between-patient standard deviation of 16 points (Sawka unpublished). Norman reported that across a wide range of questionnaires, the minimally important difference (MID) was around one half a standard deviation<sup>34</sup>. The non-inferiority boundary should be smaller than the MID, as it represents an unimportant difference. We select a value of 0.375 SD or 6 points. The decision regret scale sums scores on 5 questions, each scored 1-5 and transforms to a 0-100 range<sup>30</sup>. This means that a difference of one level on one question corresponds to 5 points on the final scale. Our non-inferiority boundary allows an average difference of 1 level on one question, but little more. The level of decision regret in the AS group will be considered non-inferior if the upper end of the 95% one-sided interval for the difference in mean regret scores lies below the value of the non-inferiority boundary. The minimum sample size required to demonstrate that decision regret is not inferior at 1 year in patients choosing AS compared to those choosing thyroid surgery, is a total of 180 patients from the combined study arms (assuming 80% power, a one-sided 95% confidence interval, and a MID of 6 points on the decision regret questionnaire). As there may be some attrition during the study, we will target a combined sample size from the follow-up arms of approximately 200

1  
2  
3 patients. We cannot control the number of patients enrolling in either arm, as the  
4  
5  
6 ultimate treatment decision is based on patient choice.  
7

### 8 **Statistical analysis**

9  
10 The first phase of the study (AS or surgery decision-making) is a descriptive study, and  
11  
12 the primary outcome of percentage (and 95% confidence intervals) of study participants  
13  
14 who ultimately choose AS or surgery. Demographic and disease characteristics will be  
15  
16 descriptively summarized, with means and standard deviations for continuous outcome  
17  
18 and number and percentages for categorical outcomes. All baseline questionnaire data  
19  
20 will be scored as per developers, for total scores or subscale scores and results  
21  
22 summarized for the entire study population (as well as the ultimate disease  
23  
24 management subgroups). If there is a sufficient number of patients in both AS and  
25  
26 surgical groups, then we will compare the baseline characteristics between groups,  
27  
28 using unpaired Student's t-tests. Furthermore, if there is a sufficient number of patients  
29  
30 for analysis, a predictive analysis examining predictors of choosing AS, will be  
31  
32 performed using a logistic regression analysis (incorporating demographic and disease  
33  
34 factors). We will use a previously reported concurrent mixed methods approach<sup>35,36</sup> to  
35  
36 ascertain patients' reasons for treatment choice, by collecting data from semi-structured  
37  
38 questions, coding responses, and identifying themes.  
39  
40  
41  
42  
43  
44

45  
46 In the follow-up phase of the study, the primary analysis will be a descriptive analysis of  
47  
48 the level of decision regret<sup>30</sup>, expressed as a mean and standard deviation in the AS  
49  
50 arm and surgical arm, respectively. Assuming a sufficient number of participants in both  
51  
52 the AS and surgical arm for meaningful analysis, an unpaired Student's t-test will be  
53  
54 performed, comparing decision regret scores in each group. The comparative analysis  
55  
56  
57  
58  
59  
60

1  
2  
3 of decision regret scores between groups will be a non-inferiority (one-sided)  
4  
5 comparison. Other quantitative data from all other questionnaires for each treatment  
6  
7 subgroup will be summarized descriptively, as means and 95% confidence intervals, as  
8  
9 appropriate for the questionnaire scores and subscale scores.  
10  
11

## 12 **ETHICS AND DISSEMINATION**

### 13 **Informed consent**

14  
15  
16  
17 Informed consent is obtained from study participants enrolling in the respective parts of  
18  
19 the study, including, 1) decision-making on disease management (AS or surgery), and  
20  
21 2) a) active surveillance follow-up arm, b) surgical arm. Patients are assured that their  
22  
23 participation is voluntary and they may withdraw from the study at any time.  
24  
25

26  
27 Furthermore, for patients withdrawing from the study, assistance with arrangement of  
28  
29 continuity of clinical follow-up care will be offered, if needed. Furthermore, patients  
30  
31 opting for AS may change their minds and have thyroid surgery at any point in follow-up  
32  
33 (regardless of whether the disease has progressed or not). Participants may choose to  
34  
35 provide optional consent for additional follow-up up to 10 years for any aspect of the  
36  
37 study.  
38  
39

### 40 **Study registration, ethics review and data protection**

41  
42  
43 This study is registered at Clinicaltrials.gov: NCT03271892. Research ethics board  
44  
45 approval for the study has been obtained at UHN, in Toronto, Canada. If additional  
46  
47 study sites are added, additional research ethics board approval will be obtained at all  
48  
49 participating sites and UHN.  
50  
51

### 52 **Access to data and dissemination**

1  
2  
3 Only the study co-primary investigators (AMS, DPG), research staff, and statistician will  
4 have access to the raw data, which will be securely stored. All participants are assigned  
5 a unique study identifier number. No identifying patient information will be shared.  
6  
7  
8 Aggregate study results will be presented at scientific conferences and the results of the  
9  
10 study published in one or more peer-reviewed open access journals. Study results will  
11  
12 also be disseminated to local thyroid cancer specialists and patient support group  
13  
14 representatives.  
15  
16  
17  
18

### 19 **Recruitment and status of the study**

20  
21 This study is currently approved by the UHN Research Ethics Board and enrollment is  
22  
23 in progress. The total duration of the study is expected to be up to 10 years and further  
24  
25 research funding will be sought for support of long-term follow-up and outcome  
26  
27 assessment.  
28  
29  
30

### 31 **Perspective**

32  
33 Management of low risk PTC is currently evolving, with a trend for providing more  
34  
35 conservative options for patients who are at lowest risk of dying of their disease<sup>13</sup>.  
36  
37 Active surveillance as been proposed as a means to mitigate potential overtreatment  
38  
39 and treatment-related complications in patients with low risk PTC<sup>16-18</sup>. Furthermore, in  
40  
41 Japan, AS has emerged as a viable treatment option for papillary microcarcinoma<sup>19,20</sup>.  
42  
43 Yet outside of Japan, the acceptability of AS among patients with low risk PTC is  
44  
45 unknown, and more research is needed examining the long-term outcomes (clinical and  
46  
47 psychosocial) in patients with larger tumor sizes. This prospective study is intended to  
48  
49 complement that of existing research in AS of PTC from other parts of the world, and  
50  
51  
52  
53  
54  
55  
56  
57  
58  
59  
60



1  
2  
3 inform potential expansion of disease management options for future patients with low  
4  
5 risk PTC.  
6  
7  
8  
9

10 **Contributors** The co-primary investigators, DPG and AMS designed the study,  
11  
12 obtained funding for the study, oversee all aspects of execution and reporting of the  
13  
14 study. SG has provided input in study design, and is the primary study radiologist,  
15  
16 providing input on interpretation of ultrasound imaging of the neck. All of the surgeon  
17  
18 investigators have provided input in study design, are active in assisting in participant  
19  
20 recruitment for the study, and provided input on this manuscript (LR, RG, PG, JP, DB,  
21  
22 JDA, JI, DC, KD, KH, EM). GT, JJ, and AG have provided input in methodologic aspects  
23  
24 of the study design and assisted in the application for study funding. GT is the  
25  
26  
27  
28  
29  
30  
31  
32  
33  
34  
35  
36  
37  
38  
39  
40  
41  
42  
43  
44  
45  
46  
47  
48  
49  
50  
51  
52  
53  
54  
55  
56  
57  
58  
59  
60

statistician overseeing analysis of the study results. All authors have approved the final manuscript.

**Funding** Funding for the first phase of this study (medical decision-making) was obtained from an operating grant (Innovation Grant) from the Ontario Academic Health Sciences Centres Alternate Funding Plan Innovation Fund (Ontario Ministry of Health). The follow-up phase of the study (AS and surgical arm follow-up to 1 year) is funded by an operating grant from the Canadian Cancer Society Research Institute (The Lotte and John Hecht Memorial Foundation Innovation Grant, #703948).

**Competing Interests** None declared.

**Ethics approval** This study is approved by the University Health Network Research Ethics Board in Toronto, Canada.

1  
2  
3 **Acknowledgments:** The authors are grateful to Drs. Akira Miyauchi and Michael Tuttle,  
4 who answered questions and provided advice on the design of the AS clinical protocol.  
5  
6 The authors would also like to acknowledge the valuable assistance of the study  
7  
8 research staff, including Mr. Tom Yoannidis, Mrs. Coreen Marino, and Ms. Jeverlynn  
9  
10 Danzie.  
11  
12  
13  
14  
15  
16  
17  
18  
19  
20  
21  
22  
23  
24  
25  
26  
27  
28  
29  
30  
31  
32  
33  
34  
35  
36  
37  
38  
39  
40  
41  
42  
43  
44  
45  
46  
47  
48  
49  
50  
51  
52  
53  
54  
55  
56  
57  
58  
59  
60

For peer review only

Table 1.

| <b>Details of Study Inclusion and Exclusion Criteria</b><br><b>(At baseline assessment, prior to deciding on surgery or active surveillance)*</b>                                                                                                                                           |                                                                                                                          |
|---------------------------------------------------------------------------------------------------------------------------------------------------------------------------------------------------------------------------------------------------------------------------------------------|--------------------------------------------------------------------------------------------------------------------------|
| <b><i>Inclusion criteria</i></b>                                                                                                                                                                                                                                                            | <b><i>Exclusion criteria</i></b>                                                                                         |
| Age ≥18 years                                                                                                                                                                                                                                                                               | Known regional or distant metastatic thyroid cancer at the time of baseline evaluation (prior to thyroid cancer surgery) |
| Newly diagnosed, previously untreated papillary thyroid cancer (PTC) < 2cm in maximal diameter on ultrasound imaging. Fine needle aspiration biopsy of the primary tumor must be read as either PTC or suspicious for PTC (as reviewed by a cytopathologist at a participating study site). | A history of prior thyroid cancer surgery                                                                                |
| No evidence of metastatic cervical lymphadenopathy on ultrasound imaging of the neck (or other neck imaging).                                                                                                                                                                               | The primary PTC is adjacent to the recurrent laryngeal nerve or trachea                                                  |
| No other potential indication for thyroid or parathyroid surgery at the time of the assessment.                                                                                                                                                                                             | Known or suspected poorly differentiated or non-papillary thyroid cancer                                                 |
| Patient permission must be granted for review of thyroid cancer-related medical                                                                                                                                                                                                             | Medically unfit for surgery due to co-morbidity                                                                          |

|                                        |                                                                                                                                                                                                            |
|----------------------------------------|------------------------------------------------------------------------------------------------------------------------------------------------------------------------------------------------------------|
| records to determine study eligibility |                                                                                                                                                                                                            |
|                                        | Another active malignancy (excluding non-melanoma skin cancer) for which patients are receiving treatment or are less than 3 years from completing treatment.                                              |
|                                        | Pregnancy at the time of study enrollment                                                                                                                                                                  |
|                                        | Other current indications for thyroid or parathyroid surgery                                                                                                                                               |
|                                        | Patient is unable to provide informed consent for the study or comply with study follow-up procedures due to current severe active cognitive or psychiatric impairment, substance abuse, or other reasons. |

\*Eligible consenting patients participating in the respective follow-up arms of the study (ie. active surveillance or surgery), must have been enrolled the first phase of the study, where standardized information about PTC prognosis and active surveillance is offered. Consenting eligible patients in the surgical follow-up arm are enrolled after first thyroid cancer surgery is completed.

**Table 2.**

| <b>Definition of progression of papillary thyroid cancer under active surveillance for which salvage surgery is advised (one or more of the criteria listed below)*</b>                                                              |
|--------------------------------------------------------------------------------------------------------------------------------------------------------------------------------------------------------------------------------------|
| 1. Primary index PTC growth >3 mm, confirmed on two consecutive ultrasound exams. The 3 mm size cut off has been shown to be safe and effectively treated in prior VL-PTC AS studies (19,20,22) and is considered reproducible (37). |
| 2. Primary PTC growth in a location that is concerning (e.g. immediately adjacent to the trachea or in the course of the recurrent laryngeal nerve).                                                                                 |
| 3. Incident development of metastatic PTC to lymph nodes (confirmed on cytology or unequivocal imaging)                                                                                                                              |
| 4. Incident development of distant metastatic PTC (confirmed on imaging or biopsy or surgical histology)                                                                                                                             |

\*Patients may choose to have surgery in absence of disease progression at any time point in follow-up

## References

1. Esserman LJ, Thompson IM, Reid B, Nelson P, Ransohoff DF, Welch HG, Hwang S, Berry DA, Kinzler KW, Black WC, Bissell M, Parnes H, Srivastava S. Addressing overdiagnosis and overtreatment in cancer: a prescription for change. *Lancet Oncol* 2014;15(6):e234-42.
2. Cancer Research UK. Cancerstats: Thyroid cancer incidence statistics. <http://www.cancerresearchuk.org/cancer-info/cancerstats/types/thyroid/incidence/uk-thyroid-cancer-incidence-statistics> Accessed August 30, 2017.
3. Canadian Cancer Society's Advisory Committee on Cancer Statistics. Canadian Cancer Statistics 2017. <http://www.cancer.ca/~media/cancer.ca/CW/publications/Canadian%20Cancer%20Statistics/Canadian-Cancer-Statistics-2017-EN.pdf> Accessed August 30, 2017.
4. American Cancer Society: Cancer Facts and Figures 2017. <https://www.cancer.org/content/dam/cancer-org/research/cancer-facts-and-statistics/annual-cancer-facts-and-figures/2017/cancer-facts-and-figures-2017.pdf> Accessed August 30, 2017.
5. EUCAN (International Agency for Research on Cancer of the World Health Organization). Cancer fact sheets: Thyroid cancer – both sexes. Available at: <http://eco.iarc.fr/eucan/Cancer.aspx?Cancer=35> Accessed August 30, 2017.
6. Guay B, Johnson-Obaseki S, McDonald JT, Connell C, Corsten M. Incidence of Differentiated Thyroid Cancer by Socioeconomic Status and Urban Residence: Canada 1991-2006. *Thyroid* 2014;24(3):442-5.

- 1  
2  
3 7. Kent WD, Hall SF, Isotalo PA, Houlden RL, George RL, Groome PA. Increased  
4  
5 incidence of differentiated thyroid carcinoma and detection of subclinical disease.  
6  
7  
8 *Can Med Assoc J* 2007;177(11):1357-61.  
9
- 10 8. Pathak KA, Leslie WD, Klonisch TC, Nason RW. The changing face of thyroid  
11  
12 cancer in a population-based cohort. *Cancer Medicine* 2013 Aug;2(4):537-44.  
13  
14
- 15 9. Davies L, Welch HG. Current thyroid cancer trends in the United States. *JAMA*  
16  
17 *Otolaryngol Head Neck Surg* 2014;140(4):317-22.  
18  
19
- 20 10. Albores-Saavedra J, Henson DE, Glazer E, Schwartz AM. Changing patterns in the  
21  
22 incidence and survival of thyroid cancer with follicular phenotype--papillary, follicular,  
23  
24 and anaplastic: a morphological and epidemiological study. *Endocr Pathol*  
25  
26 2007;18(1):1-7.  
27  
28
- 29 11. Enewold L, Zhu K, Ron E, Marrogi AJ, Stojadinovic A, Peoples GE, Devesa SS.  
30  
31 Rising thyroid cancer incidence in the United States by Demographic and Tumor  
32  
33 Characteristics, 1980-2005. *Cancer Epidem Biomar* 2009; 18(3):784-91.  
34  
35
- 36 12. Chen AY, Jemal A, Ward EM. Increasing incidence of differentiated thyroid cancer in  
37  
38 the United States, 1988-2005. *Cancer* 2009;115(16):3801-7.  
39  
40
- 41 13. Haugen BR, Alexander EK, Bible KC, Doherty GM, Mandel SJ, Nikiforov YE, Pacini  
42  
43 F, Randolph GW, Sawka AM, Schlumberger M, Schuff KG, Sherman SI, Sosa JA,  
44  
45 Steward DL, Tuttle RM, Wartofsky L. 2015 American Thyroid Association  
46  
47 Management Guidelines for Adult Patients with Thyroid Nodules and Differentiated  
48  
49 Thyroid Cancer: The American Thyroid Association Guidelines Task Force on  
50  
51 Thyroid Nodules and Differentiated Thyroid Cancer. *Thyroid* 2016;26(1):1-133.  
52  
53  
54  
55  
56  
57  
58  
59  
60

- 1  
2  
3  
4  
5  
6  
7  
8  
9  
10  
11  
12  
13  
14  
15  
16  
17  
18  
19  
20  
21  
22  
23  
24  
25  
26  
27  
28  
29  
30  
31  
32  
33  
34  
35  
36  
37  
38  
39  
40  
41  
42  
43  
44  
45  
46  
47  
48  
49  
50  
51  
52  
53  
54  
55  
56  
57  
58  
59  
60
14. Perros P, Boelaert K, Colley S, Evans C, Evans RM, Gerrard Ba G, Gilbert J, Harrison B, Johnson SJ, Giles TE, Moss L, Lewington V, Newbold K, Taylor J, Thakker RV, Watkinson J, Williams GR; British Thyroid Association. Guidelines for the management of thyroid cancer. *Clin Endocrinol (Oxf)* 2014 Jul;81 Suppl 1:1-122.
  15. Pacini F, Castagna MG, Brilli L, Pentheroudakis G; ESMO Guidelines Working Group. Thyroid cancer: ESMO Clinical Practice Guidelines for diagnosis, treatment and follow-up. *Ann Oncol* 2012;23 Suppl 7:vii110-9.
  16. Leboulleux S, Tuttle RM, Pacini F, Schlumberger M. Papillary thyroid microcarcinoma: time to shift from surgery to active surveillance? *Lancet Diabetes Endocrinol* 2016;4(11):933-942. doi: 10.1016/S2213-8587(16)30180-2.
  17. Brito JP, Hay ID, Morris JC. Low risk papillary thyroid cancer. *BMJ* 2014;348:g3045. doi: 10.1136/bmj.g3045.
  18. Haymart MR, Miller DC, Hawley ST. Active Surveillance for Low-Risk Cancers – A viable solution to overtreatment? *N Engl J Med* 2017;377(3):203-206.
  19. Sugitani I, Toda K, Yamada K, Yamamoto N, Ikenaga M, Fujimoto Y. Three distinctly different kinds of papillary thyroid microcarcinoma should be recognized: our treatment strategies and outcomes. *World J Surg* 2010;34(6):1222-31.
  20. Ito Y, Miyauchi A, Kihara M, Higashiyama T, Kobayashi K, Miya A. Patient age is significantly related to the progression of papillary microcarcinoma of the thyroid under observation. *Thyroid* 2014;24(1):27-34.
  21. Tuttle RM, Fagin JA, Minkowitz G, Wong RJ, Roman B, Patel S, Untch B, Ganly I, Shaha AR, Shah JP, Pace M, Li D, Bach A, Lin O, Whiting A, Ghossein R, Landa I, Sabra M, Boucai L, Fish S, Morris LGT. Natural history and tumor volume kinetics of



- 1  
2  
3 papillary thyroid cancers during active surveillance. *JAMA Otolaryngol Head Neck*  
4  
5 *Surg* 2017 [E-publication ahead of print].  
6  
7
- 8 22. Oda H, Miyauchi A, Ito Y, Yoshioka K, Nakayama A, Sasai H, Masuoka H, Yabuta T,  
9  
10 Fukushima M, Higashiyama T, Kihara M, Kobayashi K, Miya A. Incidences of  
11  
12 unfavorable events in the management of low-risk papillary microcarcinoma of the  
13  
14 thyroid by active surveillance versus immediate surgery. *Thyroid* 2016;26(1):150-5.  
15  
16
- 17 23. D'Agostino TA, Shuk E, Maloney EK, Zeuren R, Tuttle RM, Bylund CL. Treatment  
18  
19 decision making in early-stage papillary thyroid cancer. *Psychooncology* 2017 [E-  
20  
21 publication ahead of print].  
22  
23
- 24 24. Carver CS. You want to measure coping but your protocol's too long: Consider the  
25  
26 Brief COPE. *Int J Behav Med* 1997;4(1), 92-100.  
27  
28
- 29 25. Herschbach P, Berg P, Dankert A, Duran G, Engst-Hastreiter U, Waadt S, et al. Fear  
30  
31 of progression in chronic diseases: psychometric properties of the Fear of  
32  
33 Progression Questionnaire. *J Psychosom Res* 2005;58:505–11.  
34  
35
- 36 26. Mehnert A, Herschbach P, Berg P, Henrich G, Koch U. Fear of progression in breast  
37  
38 cancer patients--validation of the short form of the Fear of Progression  
39  
40 Questionnaire (FoP-Q-SF). *Z Psychosom Med Psychother* 2006;52(3):274-88.  
41  
42
- 43 27. Theunissen M, Peters ML, Schouten EG, Fiddelers AA, Willemsen MG, Pinto PR,  
44  
45 Gramke HF, Marcus MA. Validation of the surgical fear questionnaire in adult  
46  
47 patients waiting for elective surgery. *PLoS One* 2014 Jun 24;9(6):e100225.  
48  
49
- 50 28. Bunn H, O'Connor A. Validation of client decision-making instruments in the context  
51  
52 of psychiatry. *Can J Nurs Res* 1996;28:13-27  
53  
54  
55  
56  
57  
58  
59  
60

- 1  
2  
3  
4  
5  
6  
7  
8  
9  
10  
11  
12  
13  
14  
15  
16  
17  
18  
19  
20  
21  
22  
23  
24  
25  
26  
27  
28  
29  
30  
31  
32  
33  
34  
35  
36  
37  
38  
39  
40  
41  
42  
43  
44  
45  
46  
47  
48  
49  
50  
51  
52  
53  
54  
55  
56  
57  
58  
59  
60
29. Holmes-Rovner M, Kroll J, Schmitt N, Rovner DR, Breer ML, Rothert ML, Padonu G, Talarczyk G. Patient satisfaction with health care decisions: the satisfaction with decision scale. *Med Decis Making* 1996;16(1):58-64.
30. Brehaut JC, O'Connor AM, Wood TJ, Hack TF, Siminoff L, Gordon E, Feldman-Stewart D: Validation of a decision regret scale. *Medical Decision Making* 2003, 23(4):281-292.
31. Zigmond AS and Snaith RP: The Hospital Anxiety And Depression Scale *Acta Psychiatr Scand* 1983, 67:361-70.
32. Gning I, Trask PC, Mendoza TR, Harle MT, Gutierrez KA, Kitaka SA, Sherman SI, Cleeland CS. Development and initial validation of the thyroid cancer module of the M. D. Anderson Symptom Inventory. *Oncology* 2009;76(1):59-68.
33. Hopwood P, Fletcher I, Lee A, Al Ghazal S. A body image scale for use with cancer patients. *Eur J Cancer* 2001;37(2):189-97.
34. Norman GR, Sloan JA, Wyrwich KW. Interpretation of changes in health-related quality of life: the remarkable universality of half a standard deviation". *Med Care* 2003;41(5): 582-92.
35. Gonzalez Castro F, Kellison JG, Boyd SJ, Kopak JG 2010 A methodology for conducting integrative mixed methods research and data analysis. *J Mix Meth Res* 4:342-360.
36. Sawka AM, Rilkoﬀ H, Tsang RW, Brierley JD, Rotstein L, Ezzat S, Asa SL, Segal P, Kelly C, Zahedi A, Gafni A, Goldstein DP. The rationale of patients with early-stage papillary thyroid cancer for accepting or rejecting radioactive iodine remnant ablation. *Thyroid* 2013;23(2):246-7.

1  
2  
3 37. Brauer VF, Eder P, Miehle K, Wiesner TD, Hasenclever H, Paschke R. Interobserver  
4 variation for ultrasound determination of thyroid nodule volumes. *Thyroid*  
5  
6 2005;15(10):1169-1175.  
7  
8  
9  
10  
11  
12  
13  
14  
15  
16  
17  
18  
19  
20  
21  
22  
23  
24  
25  
26  
27  
28  
29  
30  
31  
32  
33  
34  
35  
36  
37  
38  
39  
40  
41  
42  
43  
44  
45  
46  
47  
48  
49  
50  
51  
52  
53  
54  
55  
56  
57  
58  
59  
60

For peer review only

# BMJ Open

## A Protocol for a Canadian Prospective Observational Study of Decision-making on Active Surveillance or Surgery for Low Risk Papillary Thyroid Cancer

|                                 |                                                                                                                                                                                                                                                                                                                                                                                                                                                                                                                                                                                                                                                                                                                                                                                                                                                                                                                                                                                                                                                                                                          |
|---------------------------------|----------------------------------------------------------------------------------------------------------------------------------------------------------------------------------------------------------------------------------------------------------------------------------------------------------------------------------------------------------------------------------------------------------------------------------------------------------------------------------------------------------------------------------------------------------------------------------------------------------------------------------------------------------------------------------------------------------------------------------------------------------------------------------------------------------------------------------------------------------------------------------------------------------------------------------------------------------------------------------------------------------------------------------------------------------------------------------------------------------|
| Journal:                        | <i>BMJ Open</i>                                                                                                                                                                                                                                                                                                                                                                                                                                                                                                                                                                                                                                                                                                                                                                                                                                                                                                                                                                                                                                                                                          |
| Manuscript ID                   | bmjopen-2017-020298.R1                                                                                                                                                                                                                                                                                                                                                                                                                                                                                                                                                                                                                                                                                                                                                                                                                                                                                                                                                                                                                                                                                   |
| Article Type:                   | Protocol                                                                                                                                                                                                                                                                                                                                                                                                                                                                                                                                                                                                                                                                                                                                                                                                                                                                                                                                                                                                                                                                                                 |
| Date Submitted by the Author:   | 12-Jan-2018                                                                                                                                                                                                                                                                                                                                                                                                                                                                                                                                                                                                                                                                                                                                                                                                                                                                                                                                                                                                                                                                                              |
| Complete List of Authors:       | Sawka, Anna; Endocrinology<br>Ghai, Sangeet; University Health Network, Radiology<br>Tomlinson, George; University of Toronto, Epidemiology and Biostatistics<br>Rotstein, Lorne; University Health Network, Surgery<br>Gilbert, Ralph; University Health Network, Head and Neck Surgery<br>Gullane, Patrick; University Health Network, Head and Neck Surgery<br>Pasternak, Jesse; University Health Network, Surgery<br>Brown, Dale; University Health Network, Head and Neck Surgery<br>de Almeida, John; University of Toronto, Wharton Head and Neck Centre<br>Irish, Jonathan; University Health Network, Head and Neck Surgery<br>Chepeha, Douglas; University Health Network, Head and Neck Surgery<br>Higgins, Kevin; Sunnybrook Health Sciences Centre, Head and Neck Surgery<br>Monteiro, Eric; Mount Sinai Hospital, Head and Neck Surgery<br>Jones, J; Princess Margaret Cancer Centre, Psychosocial Oncology<br>GAFNI, Amiram; McMaster University (HSC-3H29), Department of Clinical Epidemiology and Biostatistics<br>Goldstein, David; University Health Network, Head and Neck Surgery |
| <b>Primary Subject Heading</b>: | Oncology                                                                                                                                                                                                                                                                                                                                                                                                                                                                                                                                                                                                                                                                                                                                                                                                                                                                                                                                                                                                                                                                                                 |
| Secondary Subject Heading:      | Medical management, Patient-centred medicine, Radiology and imaging, Surgery                                                                                                                                                                                                                                                                                                                                                                                                                                                                                                                                                                                                                                                                                                                                                                                                                                                                                                                                                                                                                             |
| Keywords:                       | Endocrine tumours < DIABETES & ENDOCRINOLOGY, Head & neck tumours < ONCOLOGY, Head & neck imaging < RADIOLOGY & IMAGING, Head & neck surgery < SURGERY                                                                                                                                                                                                                                                                                                                                                                                                                                                                                                                                                                                                                                                                                                                                                                                                                                                                                                                                                   |
|                                 |                                                                                                                                                                                                                                                                                                                                                                                                                                                                                                                                                                                                                                                                                                                                                                                                                                                                                                                                                                                                                                                                                                          |

SCHOLARONE™  
Manuscripts

1  
2  
3 **A Protocol for a Canadian Prospective Observational Study of**  
4  
5 **Decision-making on Active Surveillance or Surgery for**  
6  
7 **Low Risk Papillary Thyroid Cancer**  
8  
9  
10  
11  
12  
13

14 Anna M. Sawka<sup>1</sup>, Sangeet Ghai<sup>2</sup>, George Tomlinson<sup>3</sup>, Lorne Rotstein<sup>4</sup>, Ralph Gilbert<sup>5</sup>,  
15 Patrick Gullane<sup>5</sup>, Jesse Pasternak<sup>4</sup>, Dale Brown<sup>5</sup>, John de Almeida<sup>5</sup>, Jonathan Irish<sup>5</sup>,  
16 Douglas Chepeha<sup>5</sup>, Kevin Higgins<sup>6</sup>, Eric Monteiro<sup>7</sup>, Jennifer Jones<sup>8</sup>, Amiram Gafni<sup>9</sup>,  
17 David P. Goldstein<sup>5</sup>  
18  
19  
20  
21  
22  
23  
24  
25  
26

27 <sup>1</sup>Department of Endocrinology, University Health Network and University of Toronto,  
28 Toronto, Canada  
29  
30  
31

32 <sup>2</sup>Department of Radiology, University Health Network and University of Toronto,  
33 Toronto, Canada  
34  
35  
36

37 <sup>3</sup>Department of Epidemiology and Biostatistics, University Health Network and  
38 University of Toronto, Toronto, Canada  
39  
40  
41  
42

43 <sup>4</sup>Department of Surgery, University Health Network and University of Toronto, Toronto,  
44 Canada  
45  
46  
47

48 <sup>5</sup>Department of Otolaryngology and Head and Neck Surgery, University Health Network  
49 and University of Toronto, Toronto, Canada  
50  
51  
52  
53  
54  
55  
56  
57  
58  
59  
60

1  
2  
3 <sup>6</sup>Department of Otolaryngology and Head and Neck Surgery, Sunnybrook Health  
4  
5 Sciences Centre and University of Toronto, Toronto, Canada  
6  
7

8  
9 <sup>7</sup>Department of Otolaryngology and Head and Neck Surgery, Sunnybrook Health  
10  
11 Sciences Centre and University of Toronto, Toronto, Canada  
12

13  
14 <sup>8</sup>Department of Psychosocial Oncology, University Health Network and University of  
15  
16 Toronto, Toronto, Canada  
17

18  
19 <sup>9</sup>Centre for Health Economics and Policy Analysis, McMaster University, Hamilton,  
20  
21 Canada  
22  
23

24  
25  
26  
27  
28 **Correspondence to:** Anna M. Sawka; sawkaam@yahoo.com  
29  
30  
31  
32  
33  
34  
35  
36  
37  
38  
39  
40  
41  
42  
43  
44  
45  
46  
47  
48  
49  
50  
51  
52  
53  
54  
55  
56  
57  
58  
59  
60

## ABSTRACT

**Introduction** Low risk papillary thyroid cancer (PTC) is increasingly being diagnosed throughout the world; yet the mortality risk is low compared to other malignancies.

Traditional management includes thyroid surgery, sometimes followed by radioactive iodine and thyroid hormone treatment. Active surveillance (AS) has been proposed as a means to reduce over treatment of PTC. AS involves close disease follow-up, with the intention to intervene if the disease progresses, or upon patient request.

**Methods and analysis** This is a multi-phase prospective observational study. In the first phase of this study, consenting eligible adults with low risk PTC that is < 2cm in maximal diameter, confined to the thyroid, and not immediately adjacent to critical structures in the neck, are provided verbal and written information about PTC disease prognosis following surgery or AS. Questionnaires are administered at baseline and after the disease management decision on AS or surgery is finalized. Patients may choose either option (surgery or AS), and the primary outcome is the frequency with which either disease management option is chosen. Secondary outcomes include: rationale for the decision, role of the patient in decision-making, and decision satisfaction.

In the second phase of the study, consenting eligible adult patients who completed the first study phase may enroll in respective AS or surgery group follow-up studies. The following outcomes are examined 1 year after enrollment in the follow-up phase: decision regret about disease management choice (primary outcome), psychological distress, disease-specific quality of life, fear of disease progression, body image

1  
2  
3 satisfaction, disease progression, cross-over to surgery in the AS group, new chronic  
4 thyroid hormone use, and healthcare resource utilization.  
5  
6

7  
8 **Ethics and dissemination** The University Health Network Research Ethics Board  
9 approved this study (ID 15-8942). The results will be published in an open access  
10 journal.  
11  
12  
13

14  
15  
16 **Registration details** Clinicaltrials.gov: NCT03271892

17  
18 (<https://clinicaltrials.gov/ct2/show/NCT03271892?term=NCT03271892&cond=Thyroid+Cancer%2C+Papillary&cntry1=NA%3ACA&rank=1>)  
19  
20  
21  
22  
23

### 24 25 26 27 **Strengths and limitations of this study**

- 28  
29  
30 • A strength of this study is that it is the first study to conduct a detailed  
31 prospective evaluation of decision-making related to the choice of active  
32 surveillance (AS) or immediate thyroid surgery, for management of low risk  
33 papillary thyroid cancer (PTC).  
34  
35
- 36  
37 • Another strength of this study is the inclusion of secondary outcomes such as:  
38 psychological distress (depression and anxiety), disease-specific quality of life,  
39 fear of disease progression, and body image satisfaction, is an important  
40 strength.  
41  
42
- 43  
44 • A limitation of this study is that participants are not randomized to AS or surgical  
45 arms, as the choice of disease management is per the patient and treating  
46 physician.  
47  
48  
49  
50  
51  
52  
53  
54  
55  
56  
57  
58  
59  
60



- 1  
2  
3  
4  
5  
6  
7  
8  
9  
10  
11  
12  
13  
14  
15  
16  
17  
18  
19  
20  
21  
22  
23  
24  
25  
26  
27  
28  
29  
30  
31  
32  
33  
34  
35  
36  
37  
38  
39  
40  
41  
42  
43  
44  
45  
46  
47  
48  
49  
50  
51  
52  
53  
54  
55  
56  
57  
58  
59  
60
- Another limitation of this study is that for patients who undergo thyroid cancer surgery, the surgical procedure and associated follow-up procedures are at the discretion of the treating physician and patient; which is intended to be reflective of usual care.

For peer review only

## INTRODUCTION

Increased utilization of diagnostic imaging has resulted in increased diagnosis of incidental malignancies that have a low risk of progression or death.<sup>1</sup> Some recent annual estimates on the number of individuals newly diagnosed with thyroid cancer include: 298,000 world-wide<sup>2</sup>, 7,100 in Canada<sup>3</sup>, 56,870 in the United States<sup>4</sup>, 53,000 in Europe<sup>5</sup>, and 3,400 in the United Kingdom<sup>2</sup>. In Canada, TC incidence is rising faster than any other malignancy<sup>3</sup>, with an increase of 156% from 1991 to 2006<sup>6</sup>. The survival rate of thyroid cancer is among the highest of all malignancies<sup>3,4</sup> and the 5-year survival rate for early stage (local) thyroid cancer is reported to be >99%<sup>4</sup>. Most of the increase in thyroid cancer incidence is attributed to detection of papillary thyroid cancer (PTC)  $\leq$  2cm in diameter<sup>7-11</sup>, especially, localized disease without metastases (i.e. no spread of disease beyond the thyroid)<sup>8,11,12</sup>. PTCs  $\leq$ 2 cm in diameter are estimated to account for 60-68% of new cases<sup>7,9</sup>. Thyroid cancer treatment traditionally involves thyroid surgery, which may be followed by thyroid hormone replacement (lifelong) and radioactive iodine treatment<sup>13-15</sup>. However, treatment-related morbidity in individuals at low risk of dying from their disease is a relevant concern; thus the consideration of an option for a conservative, non-operative management approach for select to low risk PTC cases, has been proposed by some experts<sup>16-18</sup>.

Active surveillance (AS) of a malignancy consists of close clinical/diagnostic test follow-up (in lieu of immediate surgery), with the intention of treatment with curative intent if the disease progresses or the patient requests it. In two recent prospective observational studies from Japan, patients with PTC  $\leq$ 1cm in diameter underwent AS and there were no TC-related deaths, no distant metastatic recurrences, and the rate of cervical lymph

1  
2  
3 node recurrence was approximately 1 to 2% (followed on average for 5-6 years)<sup>19,20</sup>.  
4  
5 Furthermore, primary tumors under AS did not significantly grow (i.e.  $\geq 3$  mm diameter  
6 increase) in 93% to 95% of individuals over this time period<sup>19,20</sup>. Moreover, all cases of  
7 disease progression under AS were successfully cured with surgery<sup>19,20</sup> and the  
8 majority of patients who initially accepted AS, avoided thyroid surgery (84-94% over  
9 about 5-6 years)<sup>19,20</sup>. Furthermore, in a recently published report from an ongoing  
10 American AS study, Tuttle et al. reported low rates of tumor growth (3.8% of cases) and  
11 no evidence of incident metastatic disease, in a cohort of 291 PTC patients whose  
12 primary tumor was  $\leq 1.5$  cm in maximal diameter (median 25 month follow-up period)<sup>21</sup>.  
13  
14 A highly important consideration is the extent to which AS may be considered as an  
15 acceptable disease management by patients diagnosed with low risk PTC. In the largest  
16 study of AS in Japan, 55% of individuals with papillary microcarcinoma chose to  
17 undergo AS, when offered this option or surgery.<sup>22</sup> Similar data are not yet available  
18 from other parts of the world. However, the recent report of 291 patients with low risk  
19 PTC have been enrolled in an AS study in the United States,<sup>21</sup> suggests that there may  
20 be interest in this option in North America. In an in-depth qualitative study from the  
21 same institution, the rationale for patient choice of surgery or AS was studied 15  
22 patients.<sup>23</sup> In this study, D'Agostino et al. reported that that patients who opted for  
23 surgery perceived a strong threat of the disease and were motivated to cure the  
24 malignancy, whereas those who chose AS perceived the disease to be relatively  
25 indolent and were motivated to avoid living without their thyroid (and possible reliance  
26 on thyroid hormone replacement)<sup>23</sup>. The frequency with which Canadian with low risk  
27 PTC would prefer AS or surgery (and the rationale for the choice), is unknown.  
28  
29  
30  
31  
32  
33  
34  
35  
36  
37  
38  
39  
40  
41  
42  
43  
44  
45  
46  
47  
48  
49  
50  
51  
52  
53  
54  
55  
56  
57  
58  
59  
60

1  
2  
3 Furthermore, prospectively collected quantitative data on decision-making process and  
4 relevant psychosocial/quality of life patient reported outcomes are needed for low risk  
5  
6  
7  
8 PTC patients offered the options of surgery or AS.  
9

## 10 **DESIGN, METHODS AND ANALYSIS**

### 11 **Study design and setting**

12  
13  
14 We are conducting a multi-phase prospective observational study of patients with low  
15 risk PTC. The study is currently being conducted at the University Health Network  
16  
17 (UHN) hospitals in Toronto (including Toronto General Hospital, Princess Margaret  
18  
19 Cancer Centre, and Toronto Western Hospital), with the plan to add additional sites, if  
20  
21  
22 feasible.  
23  
24  
25

### 26 **Study aim and primary outcomes in respective study phases**

27  
28 In the first phase of this study, our aim is to prospectively examine the decision-making  
29  
30 process of patients with low risk PTC considering surgery or active surveillance and the  
31  
32 primary outcome is the frequency (percentage) of patients choosing AS or surgery,  
33  
34 respectively. In the second phase of the study, consenting patients who completed the  
35  
36 first phase of the study are followed in the respective study arms of a) active  
37  
38 surveillance, or b) surgery (according to patient choice). The primary outcome in the  
39  
40 second phase of the study is decision regret (with respect to the decision on AS or  
41  
42 surgery, to be described in respective arms).  
43  
44  
45  
46

### 47 **The study population eligibility criteria and recruitment**

48  
49 In the first phase of the study, we are enrolling consenting eligible adults (age  $\geq 18$   
50  
51 years) with surgically untreated low risk PTC that is confined to the thyroid, not  
52  
53 immediately adjacent to critical structures in the neck (e.g. trachea or recurrent  
54  
55  
56  
57  
58  
59  
60

1  
2  
3 laryngeal nerve), and measures <2cm in maximal diameter (Table 1). The inclusion  
4  
5 criteria, relating to the primary tumor characteristics, were reviewed and approved (by  
6  
7 consensus) by all thyroid cancer surgeons in our institution. In the first study phase,  
8  
9 study participants are provided verbal and written information about thyroid cancer  
10  
11 disease prognosis and information about AS. This information is regularly updated to  
12  
13 reflect the evolving evidence on long-term outcomes with AS of low risk PTC.  
14  
15  
16 Participants are free to choose either surgery or AS for management of their thyroid  
17  
18 cancer. Eligible consenting patients who have completed the first phase of this study  
19  
20 (and rendered a disease management decision) may enroll in the second phase of the  
21  
22 study, which includes study follow-up of respective disease management arms of: a)  
23  
24 active surveillance, or b) thyroid cancer surgery. Patient recruitment is focused in  
25  
26 participating thyroid cancer surgical clinics, although eligible patients may be referred by  
27  
28 other healthcare providers or self-referred. All patients receive a formal consultation  
29  
30 from a thyroid cancer surgeon (of their choice) prior to consideration of enrollment in  
31  
32 any phase of the study. Patients who may be eligible for the study, are offered the  
33  
34 opportunity to meet with a research assistant. Screening for eligibility is performed by a  
35  
36 research assistant, under the supervision of one or more of the primary co-primary  
37  
38 investigators (DPG, AMS). Baseline neck imaging studies are reviewed by a study  
39  
40 radiologist (SG) and surgeon (DPG) to confirm eligibility.  
41  
42  
43  
44  
45  
46  
47

### 48 **Study follow-up assessments and outcomes**

49

50  
51 In the first phase of the study (decision-making phase), a baseline medical history,  
52  
53 physical examination and laryngoscopy (if not already performed), are performed.  
54  
55 Several questionnaires are administered at baseline (prior to the presentation of the  
56  
57  
58  
59  
60

1  
2  
3 information about AS), as well as after the disease management decision on AS or  
4 surgery is finalized (generally within a few months of study enrollment). Baseline  
5 questionnaires include questions on demographic and medical history, coping  
6 mechanisms (Brief Cope Questionnaire<sup>24</sup>), fear of disease progression (Short form of  
7 the Fear of Progression Questionnaire<sup>25,26</sup>), fear of surgery (Surgical Fear  
8 Questionnaire<sup>27</sup>), and decision self-efficacy (Decision Self-Efficacy Scale<sup>28</sup>). The primary  
9 outcome is the frequency with which either disease management option is chosen by  
10 the patient (AS or immediate surgery). Secondary outcomes include: rationale for the  
11 decision, role of the patient in decision-making, and decision satisfaction<sup>29</sup>.  
12  
13  
14  
15  
16  
17  
18  
19  
20  
21  
22  
23

24 In the second phase of the study, consenting eligible adult patients who completed the  
25 first study phase may enroll in a follow-up study of respective AS or surgery arms. The  
26 active surveillance arm includes follow-up assessments by study investigators at least  
27 every 6 months for two years, followed by yearly (if no evidence of disease  
28 progression). These assessments include clinical history and examination, neck  
29 ultrasound, and measurement of TSH, free thyroxine, thyroglobulin, and thyroglobulin  
30 antibody. More frequent assessments or additional investigations may be arranged,  
31 depending on clinical circumstances. Thyroid hormone treatment is offered as per  
32 current clinical practice guidelines for chronic management of low risk PTC<sup>13</sup>, but its use  
33 is not mandated for participation in the AS follow-up study. The criteria for disease  
34 progression prompting a recommendation for surgery are shown in Table 2. All patients  
35 under active surveillance are free to choose to have surgery at any time point, in  
36 absence of disease progression. For consenting patients who choose surgery for  
37 primary management of their disease, the treating surgeon and patient will decide on  
38  
39  
40  
41  
42  
43  
44  
45  
46  
47  
48  
49  
50  
51  
52  
53  
54  
55  
56  
57  
58  
59  
60

1  
2  
3 the extent of the surgery and associated clinical follow-up. For study participants in  
4 either arm that undergo thyroid cancer surgery, there are no restrictions on which  
5 surgeon or where the surgery may be performed (i.e. as per patient choice).  
6  
7  
8  
9

10  
11 One year after enrollment in the respective AS or surgical follow-up study arms, the  
12 following study outcomes are examined: decision regret about disease management  
13 choice (primary outcome) (Decision Regret Scale<sup>30</sup>), psychological distress (depression  
14 and anxiety, measured by the Hospital Depression and Anxiety Scale<sup>31</sup>), disease-  
15 specific quality of life (measured by the thyroid cancer module of the MD Anderson  
16 Symptom Inventory<sup>32</sup>), fear of disease progression<sup>25,26</sup>, and body image satisfaction  
17 (measured by the Body Image Scale<sup>33</sup>). Furthermore, thyroid cancer-related medical  
18 records are examined in all patients to evaluate for disease progression, cross-over to  
19 surgery in the AS group, new chronic thyroid hormone use, and thyroid cancer-related  
20 healthcare resource utilization. Consent for review of medical records is requested for a  
21 minimum of 3 years, but an optional consent is requested for review of records up to 10  
22 years. However, indefinite clinical follow-up is offered for patients under AS, who do not  
23 undergo surgery.  
24  
25  
26  
27  
28  
29  
30  
31  
32  
33  
34  
35  
36  
37  
38  
39  
40

## 41 **Statistical considerations**

### 42 **Sample size calculation**

43  
44  
45 There is no a priori calculated sample size for the first phase of the study (on medical  
46 decision-making), as it is a descriptive study incorporating a convenience sample;  
47 however, the study will continue enrolling patients to adequately power meaningful  
48 analysis of the primary outcome in the follow-up study. As our primary analysis for the  
49  
50  
51  
52  
53  
54  
55  
56  
57  
58  
59  
60

1  
2  
3 second phase of the study is a description of the level of decision regret in the  
4  
5 respective AS and surgical arms at 1 year, a convenience sample should technically  
6  
7 suffice. However, we are planning a secondary analysis, comparing decision regret  
8  
9 between the AS and surgical groups, assuming sufficient sample size, so a sample size  
10  
11 justification for that analysis is herein provided. There is no published data on what  
12  
13 difference in level of regret is considered unimportant, so we chose our non-inferiority  
14  
15 boundary based on the following considerations. Pilot decision regret data collected on  
16  
17 a low risk PTC sample of 74 patients in a treatment decision making showed a  
18  
19 between-patient standard deviation of 16 points (Sawka unpublished). Norman  
20  
21 reported that across a wide range of questionnaires, the minimally important difference  
22  
23 (MID) was around one half a standard deviation<sup>34</sup>. The non-inferiority boundary should  
24  
25 be smaller than the MID, as it represents an unimportant difference. We select a value  
26  
27 of 0.375 SD or 6 points. The decision regret scale sums scores on 5 questions, each  
28  
29 scored 1-5 and transforms to a 0-100 range<sup>30</sup>. This means that a difference of one level  
30  
31 on one question corresponds to 5 points on the final scale. Our non-inferiority boundary  
32  
33 allows an average difference of 1 level on one question, but little more. The level of  
34  
35 decision regret in the AS group will be considered non-inferior if the upper end of the  
36  
37 95% one-sided interval for the difference in mean regret scores lies below the value of  
38  
39 the non-inferiority boundary. The minimum sample size required to demonstrate that  
40  
41 decision regret is not inferior at 1 year in patients choosing AS compared to those  
42  
43 choosing thyroid surgery, is a total of 180 patients from the combined study arms  
44  
45 (assuming 80% power, a one-sided 95% confidence interval, and a MID of 6 points on  
46  
47 the decision regret questionnaire). As there may be some attrition during the study, we  
48  
49  
50  
51  
52  
53  
54  
55  
56  
57  
58  
59  
60



1  
2  
3 will target a combined sample size from the follow-up arms of approximately 200  
4 patients. The enrollment in the first phase of the study (on the choice of AS or surgery)  
5 will stop once 200 patients have been recruited in the combined AS and surgical arms  
6 of the follow-up study. We cannot control the number of patients enrolling in either arm,  
7 as the ultimate treatment decision is based on patient choice; thus our recruitment  
8 target is based on the total number of patients in both follow-up study arms.  
9  
10  
11  
12  
13  
14  
15

### 16 **Statistical analysis**

17  
18  
19 The first phase of the study (AS or surgery decision-making) is a descriptive study, and  
20 the primary outcome of percentage (and 95% confidence intervals) of study participants  
21 who ultimately choose AS or surgery. Demographic and disease characteristics will be  
22 descriptively summarized, with means and standard deviations for continuous outcome  
23 and number and percentages for categorical outcomes. All baseline questionnaire data  
24 will be scored as per developers, for total scores or subscale scores and results  
25 summarized for the entire study population (as well as the ultimate disease  
26 management subgroups). If there is a sufficient number of patients in both AS and  
27 surgical groups, then we will compare the baseline characteristics between groups,  
28 using unpaired Student's t-tests. Furthermore, if there is a sufficient number of patients  
29 for analysis, a predictive analysis examining predictors of choosing AS, will be  
30 performed using a logistic regression analysis (incorporating demographic and disease  
31 factors). We will use a previously reported concurrent mixed methods approach<sup>35,36</sup> to  
32 ascertain patients' reasons for treatment choice, by collecting data from semi-structured  
33 questions, coding responses, and identifying themes.  
34  
35  
36  
37  
38  
39  
40  
41  
42  
43  
44  
45  
46  
47  
48  
49  
50  
51  
52  
53  
54  
55  
56  
57  
58  
59  
60

1  
2  
3 In the follow-up phase of the study, the primary analysis will be a descriptive analysis of  
4 the level of decision regret<sup>30</sup>, expressed as a mean and standard deviation in the AS  
5 arm and surgical arm, respectively. Assuming a sufficient number of participants in both  
6 the AS and surgical arm for meaningful analysis, an unpaired Student's t-test will be  
7 performed, comparing decision regret scores in each group. The comparative analysis  
8 of decision regret scores between groups will be a non-inferiority (one-sided)  
9 comparison. Other quantitative data from all other questionnaires for each treatment  
10 subgroup will be summarized descriptively, as means and 95% confidence intervals, as  
11 appropriate for the questionnaire scores and subscale scores.  
12  
13  
14  
15  
16  
17  
18  
19  
20  
21  
22

## 23 **ETHICS AND DISSEMINATION**

### 24 **Informed consent**

25  
26  
27  
28 Informed consent is obtained from study participants enrolling in the respective parts of  
29 the study, including, 1) decision-making on disease management (AS or surgery), and  
30 2) a) active surveillance follow-up arm, b) surgical arm. Patients are assured that their  
31 participation is voluntary and they may withdraw from the study at any time.  
32  
33  
34  
35

36  
37 Furthermore, for patients withdrawing from the study, assistance with arrangement of  
38 continuity of clinical follow-up care will be offered, if needed. Furthermore, patients  
39 opting for AS may change their minds and have thyroid surgery at any point in follow-up  
40 (regardless of whether the disease has progressed or not). Participants may choose to  
41 provide optional consent for additional follow-up up to 10 years for any aspect of the  
42 study.  
43  
44  
45  
46  
47  
48  
49  
50

### 51 **Study registration, ethics review and data protection**

1  
2  
3 This study is registered at Clinicaltrials.gov: NCT03271892. Research ethics board  
4 approval for the study has been obtained at UHN, in Toronto, Canada. If additional  
5 study sites are added, additional research ethics board approval will be obtained at all  
6 participating sites and UHN.  
7  
8  
9

### 10 11 12 **Access to data and dissemination**

13  
14 Only the study co-primary investigators (AMS, DPG), research staff, and statistician will  
15 have access to the raw data, which will be securely stored. All participants are assigned  
16 a unique study identifier number. No identifying patient information will be shared.  
17  
18 Aggregate study results will be presented at scientific conferences and the results of the  
19 study published in one or more peer-reviewed open access journals. Study results will  
20 also be disseminated to local thyroid cancer specialists and patient support group  
21 representatives.  
22  
23  
24  
25  
26  
27  
28  
29

### 30 31 **Recruitment and status of the study**

32  
33 This study is currently approved by the UHN Research Ethics Board and enrollment is  
34 in progress. The total duration of the study is expected to be up to 10 years and further  
35 research funding will be sought for support of long-term follow-up and outcome  
36 assessment. An important limitation of our study is that we do not have preliminary pilot  
37 data on the feasibility of recruitment of Canadian low risk thyroid cancer patients in the  
38 active surveillance arm. However, at the current recruitment rate, it appears that our  
39 recruitment target will be achieved within the 10 year time frame of the study.  
40  
41  
42  
43  
44  
45  
46  
47  
48

### 49 **Perspective**

50  
51 Management of low risk PTC is currently evolving, with a trend for providing more  
52 conservative options for patients who are at lowest risk of dying of their disease<sup>13</sup>.  
53  
54  
55  
56  
57  
58  
59  
60

1  
2  
3 Active surveillance as been proposed as a means to mitigate potential overtreatment  
4 and treatment-related complications in patients with low risk PTC<sup>16-18</sup>. Furthermore, in  
5  
6 Japan, AS has emerged as a viable treatment option for papillary microcarcinoma<sup>19,20</sup>.  
7  
8 Yet outside of Japan, the acceptability of AS among patients with low risk PTC is  
9  
10 unknown, and more research is needed examining the long-term outcomes (clinical and  
11  
12 psychosocial) in patients with larger tumor sizes. This prospective study is intended to  
13  
14 complement that of existing research in AS of PTC from other parts of the world, and  
15  
16 inform potential expansion of disease management options for future patients with low  
17  
18 risk PTC. It is important to note that long-term follow-up of patients enrolled in this, and  
19  
20 other studies, examining active surveillance of low risk PTC is needed.  
21  
22  
23  
24  
25  
26  
27

28 **Contributors** The co-primary investigators, DPG and AMS designed the study,  
29  
30 obtained funding for the study, oversee all aspects of execution and reporting of the  
31  
32 study. SG has provided input in study design, and is the primary study radiologist,  
33  
34 providing input on interpretation of ultrasound imaging of the neck. All of the surgeon  
35  
36 investigators have provided input in study design, are active in assisting in participant  
37  
38 recruitment for the study, and provided input on this manuscript (LR, RG, PG, JP, DB,  
39  
40 JDA, JI, DC, KH, EM). GT, JJ, and AG have provided input in methodologic aspects of  
41  
42 the study design and assisted in the application for study funding. GT is the statistician  
43  
44 overseeing analysis of the study results. All authors have approved the final  
45  
46 manuscript.  
47  
48  
49

50  
51 **Funding** Funding for the first phase of this study (medical decision-making) was  
52  
53 obtained from an operating grant (Innovation Grant) from the Ontario Academic Health  
54  
55  
56  
57  
58  
59  
60

1  
2  
3 Sciences Centres Alternate Funding Plan Innovation Fund (Ontario Ministry of Health).

4  
5 The follow-up phase of the study (AS and surgical arm follow-up to 1 year) is funded by  
6  
7 an operating grant from the Canadian Cancer Society Research Institute (The Lotte and  
8  
9 John Hecht Memorial Foundation Innovation Grant, #703948).

10  
11  
12 **Competing Interests** None declared.

13  
14  
15 **Ethics approval** This study is approved by the University Health Network Research  
16  
17 Ethics Board in Toronto, Canada.

18  
19 **Acknowledgments:** The authors are grateful to Drs. Akira Miyauchi and Michael Tuttle,  
20  
21 who answered questions and provided advice on the design of the AS clinical protocol.  
22  
23 The authors would also like to acknowledge the valuable assistance of the study  
24  
25 research staff, including Mr. Tom Yoannidis, Mrs. Coreen Marino, and Ms. Jeverlynn  
26  
27 Danzie.  
28  
29  
30

31  
32  
33  
34  
35  
36  
37  
38  
39  
40  
41  
42  
43  
44  
45  
46  
47  
48  
49  
50  
51  
52  
53  
54  
55  
56  
57  
58  
59  
60

view only

**Table 1.**

| <b>Details of Study Inclusion and Exclusion Criteria</b><br><b>(At baseline assessment, prior to deciding on surgery or active surveillance)*</b>                                                                                                                                           |                                                                                                                          |
|---------------------------------------------------------------------------------------------------------------------------------------------------------------------------------------------------------------------------------------------------------------------------------------------|--------------------------------------------------------------------------------------------------------------------------|
| <b><i>Inclusion criteria</i></b>                                                                                                                                                                                                                                                            | <b><i>Exclusion criteria</i></b>                                                                                         |
| Age ≥18 years                                                                                                                                                                                                                                                                               | Known regional or distant metastatic thyroid cancer at the time of baseline evaluation (prior to thyroid cancer surgery) |
| Newly diagnosed, previously untreated papillary thyroid cancer (PTC) < 2cm in maximal diameter on ultrasound imaging. Fine needle aspiration biopsy of the primary tumor must be read as either PTC or suspicious for PTC (as reviewed by a cytopathologist at a participating study site). | A history of prior thyroid cancer surgery                                                                                |
| No evidence of metastatic cervical lymphadenopathy on ultrasound imaging of the neck (or other neck imaging).                                                                                                                                                                               | The primary PTC is adjacent to the recurrent laryngeal nerve or trachea                                                  |
| No other potential indication for thyroid or parathyroid surgery at the time of the assessment.                                                                                                                                                                                             | Known or suspected poorly differentiated or non-papillary thyroid cancer                                                 |
| Patient permission must be granted for review of thyroid cancer-related medical                                                                                                                                                                                                             | Medically unfit for surgery due to co-morbidity                                                                          |

|                                        |                                                                                                                                                                                                            |
|----------------------------------------|------------------------------------------------------------------------------------------------------------------------------------------------------------------------------------------------------------|
| records to determine study eligibility |                                                                                                                                                                                                            |
|                                        | Another active malignancy (excluding non-melanoma skin cancer) for which patients are receiving treatment or are less than 3 years from completing treatment.                                              |
|                                        | Pregnancy at the time of study enrollment                                                                                                                                                                  |
|                                        | Other current indications for thyroid or parathyroid surgery                                                                                                                                               |
|                                        | Patient is unable to provide informed consent for the study or comply with study follow-up procedures due to current severe active cognitive or psychiatric impairment, substance abuse, or other reasons. |

\*Eligible consenting patients participating in the respective follow-up arms of the study (ie. active surveillance or surgery), must have been enrolled the first phase of the study, where standardized information about PTC prognosis and active surveillance is offered. Consenting eligible patients in the surgical follow-up arm are enrolled after first thyroid cancer surgery is completed.

**Table 2.**

| <b>Definition of progression of papillary thyroid cancer under active surveillance for which salvage surgery is advised (one or more of the criteria listed below)*</b>                             |
|-----------------------------------------------------------------------------------------------------------------------------------------------------------------------------------------------------|
| 1. Primary index PTC growth >3 mm, confirmed on two consecutive ultrasound exams.<br>The 3 mm size cut off has been shown to be safe and effectively treated in prior VL-PTC AS studies (19,20,22). |
| 2. Primary PTC growth in a location that is concerning (e.g. immediately adjacent to the trachea or in the course of the recurrent laryngeal nerve).                                                |
| 3. Incident development of metastatic PTC to lymph nodes (confirmed on cytology or unequivocal imaging)                                                                                             |
| 4. Incident development of distant metastatic PTC (confirmed on imaging or biopsy or surgical histology)                                                                                            |

\*Patients may choose to have surgery in absence of disease progression at any time point in follow-up



## References

1. Esserman LJ, Thompson IM, Reid B, Nelson P, Ransohoff DF, Welch HG, Hwang S, Berry DA, Kinzler KW, Black WC, Bissell M, Parnes H, Srivastava S. Addressing overdiagnosis and overtreatment in cancer: a prescription for change. *Lancet Oncol* 2014;15(6):e234-42.
2. Cancer Research UK. Cancerstats: Thyroid cancer incidence statistics. <http://www.cancerresearchuk.org/cancer-info/cancerstats/types/thyroid/incidence/uk-thyroid-cancer-incidence-statistics> Accessed August 30, 2017.
3. Canadian Cancer Society's Advisory Committee on Cancer Statistics. Canadian Cancer Statistics 2017. <http://www.cancer.ca/~media/cancer.ca/CW/publications/Canadian%20Cancer%20Statistics/Canadian-Cancer-Statistics-2017-EN.pdf> Accessed August 30, 2017.
4. American Cancer Society: Cancer Facts and Figures 2017. <https://www.cancer.org/content/dam/cancer-org/research/cancer-facts-and-statistics/annual-cancer-facts-and-figures/2017/cancer-facts-and-figures-2017.pdf> Accessed August 30, 2017.
5. EUCAN (International Agency for Research on Cancer of the World Health Organization). Cancer fact sheets: Thyroid cancer – both sexes. Available at: <http://eco.iarc.fr/eucan/Cancer.aspx?Cancer=35> Accessed August 30, 2017.
6. Guay B, Johnson-Obaseki S, McDonald JT, Connell C, Corsten M. Incidence of Differentiated Thyroid Cancer by Socioeconomic Status and Urban Residence: Canada 1991-2006. *Thyroid* 2014;24(3):442-5.

- 1  
2  
3 7. Kent WD, Hall SF, Isotalo PA, Houlden RL, George RL, Groome PA. Increased  
4  
5 incidence of differentiated thyroid carcinoma and detection of subclinical disease.  
6  
7 *Can Med Assoc J* 2007;177(11):1357-61.  
8  
9
- 10 8. Pathak KA, Leslie WD, Klonisch TC, Nason RW. The changing face of thyroid  
11  
12 cancer in a population-based cohort. *Cancer Medicine* 2013 Aug;2(4):537-44.  
13
- 14 9. Davies L, Welch HG. Current thyroid cancer trends in the United States. *JAMA*  
15  
16 *Otolaryngol Head Neck Surg* 2014;140(4):317-22.  
17  
18
- 19 10. Albores-Saavedra J, Henson DE, Glazer E, Schwartz AM. Changing patterns in the  
20  
21 incidence and survival of thyroid cancer with follicular phenotype--papillary, follicular,  
22  
23 and anaplastic: a morphological and epidemiological study. *Endocr Pathol*  
24  
25 2007;18(1):1-7.  
26  
27
- 28 11. Enewold L, Zhu K, Ron E, Marrogi AJ, Stojadinovic A, Peoples GE, Devesa SS.  
29  
30 Rising thyroid cancer incidence in the United States by Demographic and Tumor  
31  
32 Characteristics, 1980-2005. *Cancer Epidem Biomar* 2009; 18(3):784-91.  
33  
34
- 35 12. Chen AY, Jemal A, Ward EM. Increasing incidence of differentiated thyroid cancer in  
36  
37 the United States, 1988-2005. *Cancer* 2009;115(16):3801-7.  
38  
39
- 40 13. Haugen BR, Alexander EK, Bible KC, Doherty GM, Mandel SJ, Nikiforov YE, Pacini  
41  
42 F, Randolph GW, Sawka AM, Schlumberger M, Schuff KG, Sherman SI, Sosa JA,  
43  
44 Steward DL, Tuttle RM, Wartofsky L. 2015 American Thyroid Association  
45  
46 Management Guidelines for Adult Patients with Thyroid Nodules and Differentiated  
47  
48 Thyroid Cancer: The American Thyroid Association Guidelines Task Force on  
49  
50 Thyroid Nodules and Differentiated Thyroid Cancer. *Thyroid* 2016;26(1):1-133.  
51  
52  
53  
54  
55  
56  
57  
58  
59  
60

- 1  
2  
3 14. Perros P, Boelaert K, Colley S, Evans C, Evans RM, Gerrard Ba G, Gilbert J,  
4  
5 Harrison B, Johnson SJ, Giles TE, Moss L, Lewington V, Newbold K, Taylor J,  
6  
7 Thakker RV, Watkinson J, Williams GR; British Thyroid Association. Guidelines for  
8  
9 the management of thyroid cancer. *Clin Endocrinol (Oxf)* 2014 Jul;81 Suppl 1:1-122.  
10  
11  
12 15. Pacini F, Castagna MG, Brilli L, Pentheroudakis G; ESMO Guidelines Working  
13  
14 Group. Thyroid cancer: ESMO Clinical Practice Guidelines for diagnosis, treatment  
15  
16 and follow-up. *Ann Oncol* 2012;23 Suppl 7:vii110-9.  
17  
18  
19 16. Leboulleux S, Tuttle RM, Pacini F, Schlumberger M. Papillary thyroid  
20  
21 microcarcinoma: time to shift from surgery to active surveillance? *Lancet Diabetes*  
22  
23 *Endocrinol* 2016;4(11):933-942. doi: 10.1016/S2213-8587(16)30180-2.  
24  
25  
26 17. Brito JP, Hay ID, Morris JC. Low risk papillary thyroid cancer. *BMJ* 2014;348:g3045.  
27  
28  
29 doi: 10.1136/bmj.g3045.  
30  
31 18. Haymart MR, Miller DC, Hawley ST. Active Surveillance for Low-Risk Cancers – A  
32  
33 viable solution to overtreatment? *N Engl J Med* 2017;377(3):203-206.  
34  
35  
36 19. Sugitani I, Toda K, Yamada K, Yamamoto N, Ikenaga M, Fujimoto Y. Three distinctly  
37  
38 different kinds of papillary thyroid microcarcinoma should be recognized: our  
39  
40 treatment strategies and outcomes. *World J Surg* 2010;34(6):1222-31.  
41  
42  
43 20. Ito Y, Miyauchi A, Kihara M, Higashiyama T, Kobayashi K, Miya A. Patient age is  
44  
45 significantly related to the progression of papillary microcarcinoma of the thyroid  
46  
47 under observation. *Thyroid* 2014;24(1):27-34.  
48  
49  
50 21. Tuttle RM, Fagin JA, Minkowitz G, Wong RJ, Roman B, Patel S, Untch B, Ganly I,  
51  
52 Shaha AR, Shah JP, Pace M, Li D, Bach A, Lin O, Whiting A, Ghossein R, Landa I,  
53  
54 Sabra M, Boucai L, Fish S, Morris LGT. Natural history and tumor volume kinetics of  
55  
56  
57  
58  
59  
60

- 1  
2  
3 papillary thyroid cancers during active surveillance. *JAMA Otolaryngol Head Neck*  
4  
5 *Surg* 2017 [E-publication ahead of print].  
6  
7  
8 22. Oda H, Miyauchi A, Ito Y, Yoshioka K, Nakayama A, Sasai H, Masuoka H, Yabuta T,  
9  
10 Fukushima M, Higashiyama T, Kihara M, Kobayashi K, Miya A. Incidences of  
11  
12 unfavorable events in the management of low-risk papillary microcarcinoma of the  
13  
14 thyroid by active surveillance versus immediate surgery. *Thyroid* 2016;26(1):150-5.  
15  
16  
17 23. D'Agostino TA, Shuk E, Maloney EK, Zeuren R, Tuttle RM, Bylund CL. Treatment  
18  
19 decision making in early-stage papillary thyroid cancer. *Psychooncology* 2017 [E-  
20  
21 publication ahead of print].  
22  
23  
24 24. Carver CS. You want to measure coping but your protocol's too long: Consider the  
25  
26 Brief COPE. *Int J Behav Med* 1997;4(1), 92-100.  
27  
28  
29 25. Herschbach P, Berg P, Dankert A, Duran G, Engst-Hastreiter U, Waadt S, et al. Fear  
30  
31 of progression in chronic diseases: psychometric properties of the Fear of  
32  
33 Progression Questionnaire. *J Psychosom Res* 2005;58:505–11.  
34  
35  
36 26. Mehnert A, Herschbach P, Berg P, Henrich G, Koch U. Fear of progression in breast  
37  
38 cancer patients--validation of the short form of the Fear of Progression  
39  
40 Questionnaire (FoP-Q-SF). *Z Psychosom Med Psychother* 2006;52(3):274-88.  
41  
42  
43 27. Theunissen M, Peters ML, Schouten EG, Fiddelers AA, Willemsen MG, Pinto PR,  
44  
45 Gramke HF, Marcus MA. Validation of the surgical fear questionnaire in adult  
46  
47 patients waiting for elective surgery. *PLoS One* 2014 Jun 24;9(6):e100225.  
48  
49  
50 28. Bunn H, O'Connor A. Validation of client decision-making instruments in the context  
51  
52 of psychiatry. *Can J Nurs Res* 1996;28:13-27  
53  
54  
55  
56  
57  
58  
59  
60

- 1  
2  
3 29. Holmes-Rovner M, Kroll J, Schmitt N, Rovner DR, Breer ML, Rothert ML, Padonu G,  
4  
5 Talarczyk G. Patient satisfaction with health care decisions: the satisfaction with  
6  
7 decision scale. *Med Decis Making* 1996;16(1):58-64.  
8  
9  
10 30. Brehaut JC, O'Connor AM, Wood TJ, Hack TF, Siminoff L, Gordon E, Feldman-  
11  
12 Stewart D: Validation of a decision regret scale. *Medical Decision Making* 2003,  
13  
14 23(4):281-292.  
15  
16  
17 31. Zigmond AS and Snaith RP: The Hospital Anxiety And Depression Scale *Acta*  
18  
19 *Psychiatr Scand* 1983, 67:361-70.  
20  
21  
22 32. Gning I, Trask PC, Mendoza TR, Harle MT, Gutierrez KA, Kitaka SA, Sherman SI,  
23  
24 Cleeland CS. Development and initial validation of the thyroid cancer module of the  
25  
26 M. D. Anderson Symptom Inventory. *Oncology* 2009;76(1):59-68.  
27  
28  
29 33. Hopwood P, Fletcher I, Lee A, Al Ghazal S. A body image scale for use with cancer  
30  
31 patients. *Eur J Cancer* 2001;37(2):189-97.  
32  
33  
34 34. Norman GR, Sloan JA, Wyrwich KW. Interpretation of changes in health-related  
35  
36 quality of life: the remarkable universality of half a standard deviation". *Med Care*  
37  
38 2003;41(5): 582-92.  
39  
40  
41 35. Gonzalez Castro F, Kellison JG, Boyd SJ, Kopak JG 2010 A methodology for  
42  
43 conducting integrative mixed methods research and data analysis. *J Mix Meth Res*  
44  
45 4:342-360.  
46  
47  
48 36. Sawka AM, Rilko H, Tsang RW, Brierley JD, Rotstein L, Ezzat S, Asa SL, Segal P,  
49  
50 Kelly C, Zahedi A, Gafni A, Goldstein DP. The rationale of patients with early-stage  
51  
52 papillary thyroid cancer for accepting or rejecting radioactive iodine remnant  
53  
54 ablation. *Thyroid* 2013;23(2):246-7.  
55  
56  
57  
58  
59  
60
